# Supplementary material for: Spatio-temporal modelling of weekly malaria incidence in children under 5 for early epidemic detection in Mozambique
Source: PubMed Central journal article supplement (PMC6006329; doi:10.1038/s41598-018-27537-4), 2018-06-18
Supplement: 41598_2018_27537_MOESM1_ESM.pdf [file 41598_2018_27537_MOESM1_ESM.pdf]

**Spatio-temporal modelling of weekly malaria incidence in children under 5 for early epidemic  
detection in Mozambique**

Kathryn L. Colborn<sup>1\*</sup>, Emanuele Giorgi<sup>2</sup>, Andrew J. Monaghan<sup>3</sup>, Eduardo Gudo<sup>4</sup>, Baltazar Candrihno<sup>5</sup>,  
Tatiana J. Marrufo<sup>4</sup>, James M. Colborn<sup>6</sup>

<sup>1</sup>Department of Biostatistics and Informatics, University of Colorado Anschutz Medical Campus, Aurora,  
CO, USA,

<sup>2</sup>Lancaster Medical School, Lancaster University, UK,

<sup>3</sup>National Center for Atmospheric Research, Boulder, CO, USA,

<sup>4</sup>Instituto Nacional de Saude, Maputo, Mozambique,

<sup>5</sup>National Malaria Control Program, Maputo, Mozambique,

<sup>6</sup>Clinton Health Access Initiative, Boston, MA, USA

\*Corresponding author: Kathryn Colborn, 13001 E. 17<sup>th</sup> Place, Room C3011, University of Colorado  
Anschutz Medical Campus, Aurora, CO 80045; email: [Kathryn.Colborn@ucdenver.edu](mailto:Kathryn.Colborn@ucdenver.edu); phone: 303-946-  
3578

# 1 Model formulation

Let  $Y_{it}$  be random variable of the number of reported malaria cases for children under 5 years in district  $\mathcal{R}_i$  and epidemiological week  $t$ . We assume that conditionally on a Gaussian spatio-temporal random effect  $S_{it}$ , the  $Y_{it}$  are mutually independent Poisson variables with mean

$$\lambda_{it} = m_{it} \exp\{d_{it}^\top \beta + S_{it}\}$$

where  $d_{it}$  is a vector of spatio-temporal explanatory variables with associated regression coefficients  $\beta$ .

Let  $S_t^\top = (S_{1t}, \dots, S_{nt})$  denote the collection of the random effects associated to each of the  $n = 142$  districts in Mozambique in week  $t$ . We then assume  $S_t$  to follow a multivariate Gaussian distribution with mean zero and covariance matrix  $\Sigma$  such that

$$[\Sigma]_{ij} = \frac{\sigma^2}{|\mathcal{R}_i||\mathcal{R}_j|} \int_{\mathcal{R}_i} \int_{\mathcal{R}_j} \exp\{-\|x_i - x_j\|/\phi\} dx_i dx_j$$

where  $|\mathcal{R}_j|$  is the area encompassed by the boundaries of district  $\mathcal{R}_i$ . We approximate the above integral using a numerical integration procedure based on a 1 km<sup>2</sup> regular grid covering the whole of Mozambique, which yields

$$[\Sigma]_{ij} \approx \frac{\sigma^2}{N_i N_j} \sum_{\tilde{x}_i \in \mathcal{R}_i} \sum_{\tilde{x}_j \in \mathcal{R}_j} \exp\{-\|\tilde{x}_i - \tilde{x}_j\|/\phi\}, \quad (1)$$

where  $\tilde{x}$  are the points on the grid and  $N_i$  are the number of points  $\tilde{x}$  falling within  $\mathcal{R}_i$ .

We model the temporal correlation between the  $Y_{it}$  using an autoregressive process of the first order, i.e.

$$S_t = \rho S_{t-1} + W_t, \quad -1 < \rho < 1$$

where  $W_t$  is the temporal innovation following a multivariate Gaussian distribution with mean zero and covariance matrix give by [\(1\)](#).

From the above assumptions, it follows that the log-density of the joint distribution of the  $S_t$  is given by

$$\log f(S_1, \dots, S_T) = \log f(S_1) + \sum_{t=2}^T f(S_t | S_{t-1}), \quad (2)$$

where

$$\log f(S_1) = -\frac{1}{2} [n \log\{2\pi\} + \det\{(1 - \rho^2)^{-1}\Sigma\} + (1 - \rho^2)S_1^\top \Sigma^{-1} S_1]$$

and

$$\log f(S_t | S_{t-1}) = -\frac{1}{2} [n \log\{2\pi\} + \det\{\Sigma\} + (S_t - \rho S_{t-1})^\top \Sigma^{-1} (S_t - \rho S_{t-1})], \quad t = 1, \dots, T.$$

## 2 Priors specification

We assume the following set of independent priors:

- $\sigma^2$  follows a Gaussian distribution left truncated in 0, with mean 1 and variance 10<sup>4</sup>;
- $\rho$  is uniform in the interval  $(-1, 1)$ ;
- finally, we use a uniform prior for  $\phi$  over the discrete set

$$\phi_i = 17 + i \times \frac{5}{19}, \quad i = 0, \dots, 19. \quad (3)$$

The use of a discrete prior for  $\phi$  allows us to make the implementation of the Monte Carlo Markov chain (MCMC) faster by pre-computing the covariance matrix in [\(1\)](#) for all the pre-defined values  $\phi_i$ .

We remind that, in fitting the model, the regression coefficients  $\beta$  are fixed at their maximum likelihood estimate from a standard Poisson model.

### 3 Implementation of the Markov chain Monte Carlo algorithm for Bayesian inference

We developed an MCMC to simulate from the posterior distributions of  $\sigma^2$ ,  $\rho$ ,  $\phi$  and  $(S_1, \dots, S_T)$  by updating each of these in turn as follows.

1.  $\phi$ : we use a Metropolis Hastings (MH) procedure and propose a new value  $\phi_{prop}$  given the current value  $\phi_{curr}$  based on a discretized Gaussian distribution with mean  $\phi_{curr}$  and variance 4.
2.  $\sigma^2$ : we use an MH procedure and propose a new value  $\sigma_{prop}^2$  on the log-scale by simulating from a Gaussian distribution with mean  $\log\{\sigma_{curr}^2\}$  with variance  $h$  which is adaptively tuned in order to obtain an acceptance rate of 23.4%.
3.  $\rho$ : we use an MH procedure on the transformed scale  $\log\{(1 + \rho)/(1 - \rho)\}$  using a Gaussian proposal with mean  $\log\{(1 + \rho_{curr})/(1 - \rho_{curr})\}$  and variance  $h$  which we tune in the same way as for  $\sigma^2$ .
4.  $(S_1, \dots, S_t)$ : we use a Hamiltonian Monte Carlo algorithm based on the leapfrog method ([Neal, 2011](#), pages 121-122) by generating the number of steps and their size from two uniform distributions within the intervals (0.0001, 0.15) and (2, 51), respectively.

We run the MCMC for 110,000 iterations with a burnin of 10,000 samples and retaining every tenth sample to obtain a final set of 10,000 samples.

Figures [1](#) and [2](#) show trace plots and correlograms of the posterior samples from the MCMC for the best model M3, defined in the main manuscript, which is based on a hold-out sample of 26 weeks. The results show a good mixing of the samples, thus indicating convergence of the MCMC.

## References

- NEAL, R. M. (2011). MCMC using Hamiltonian dynamics. In *Handbook of Markov Chain Monte Carlo*, S. Brooks, A. Gelman, G. Jones & X.-L. Meng, eds., chap. 5. Chapman & Hall, CRC Press, pp. 113–162.

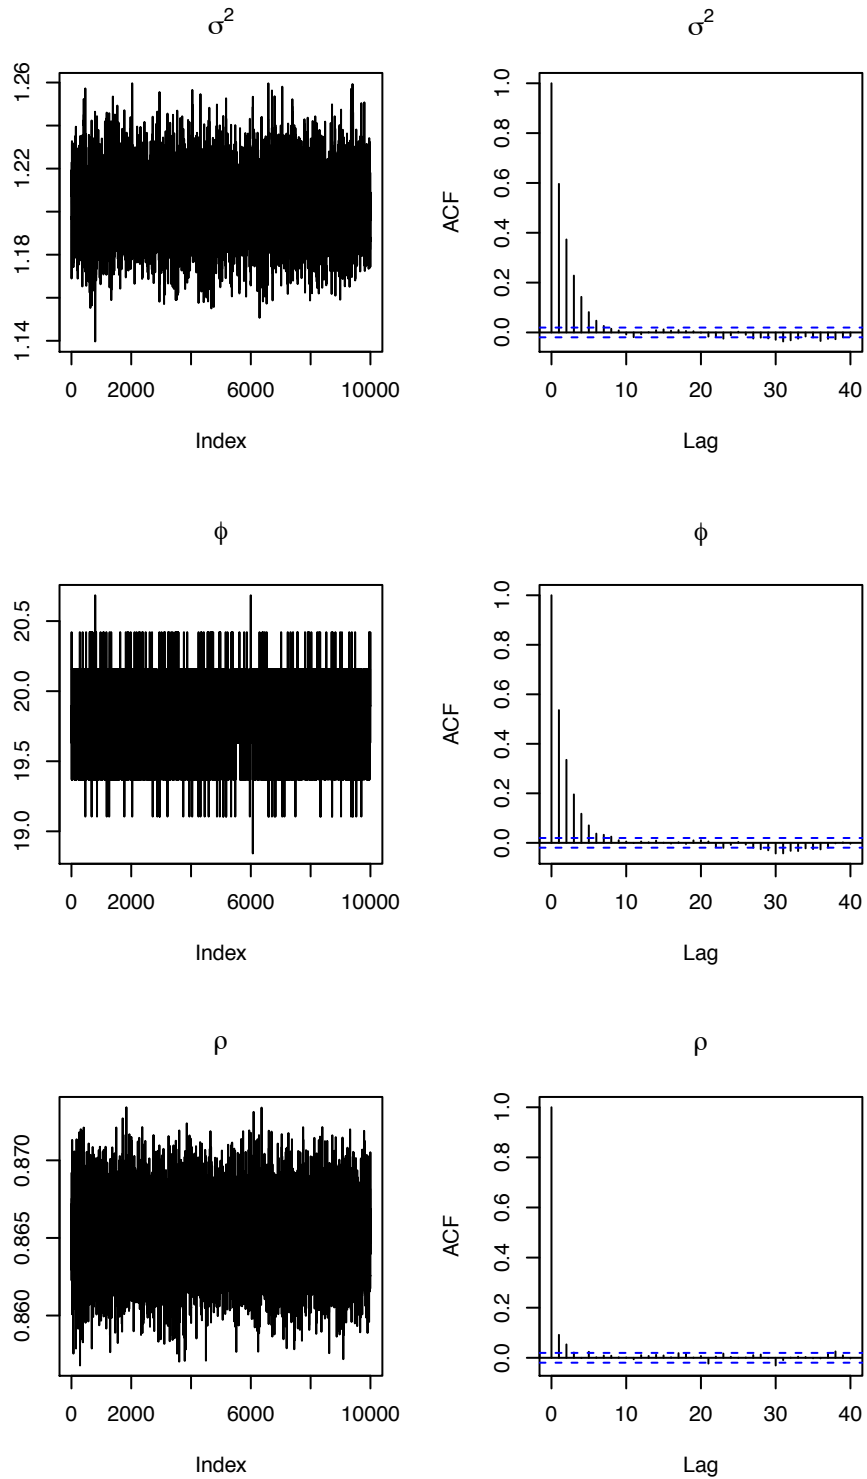

Figure 1: Trace plots (left panels) and correlograms (right panels) of the posterior samples for  $\sigma^2$  (upper panels),  $\phi$  (central panels) and  $\rho$  (lower panels).

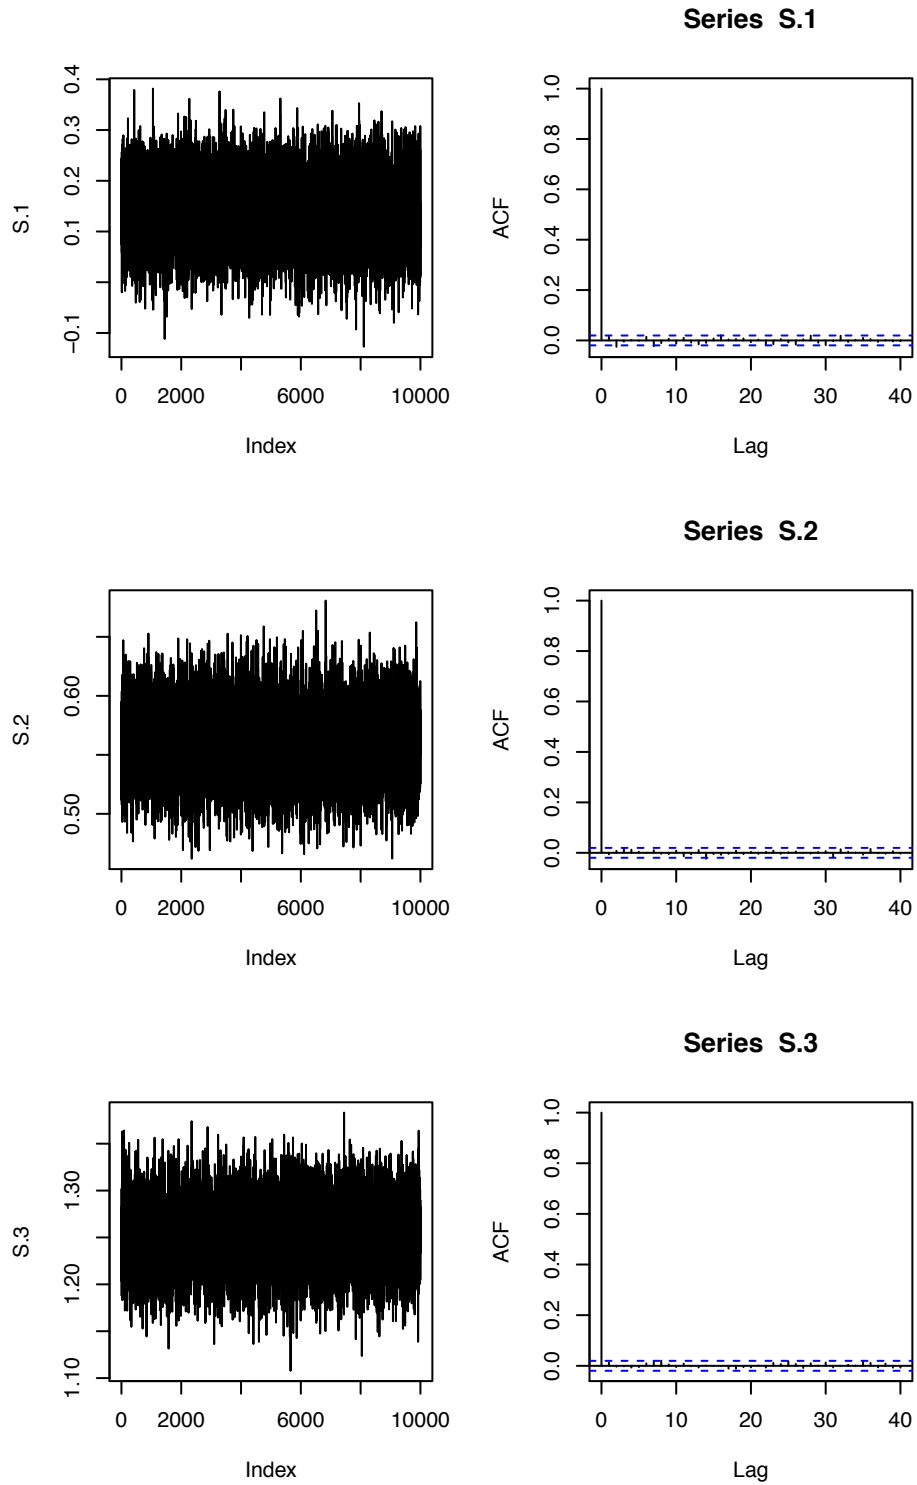

Figure 2: Trace plots and correlograms of three randomly selected components of the spatio-temporal random effects  $S_{it}$ .

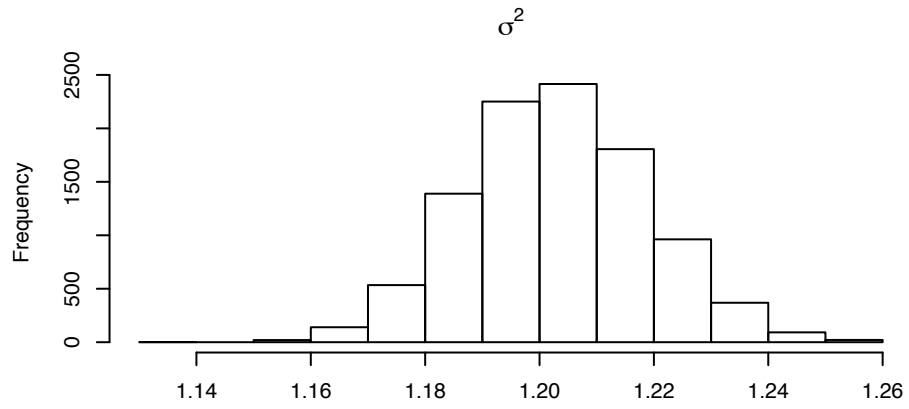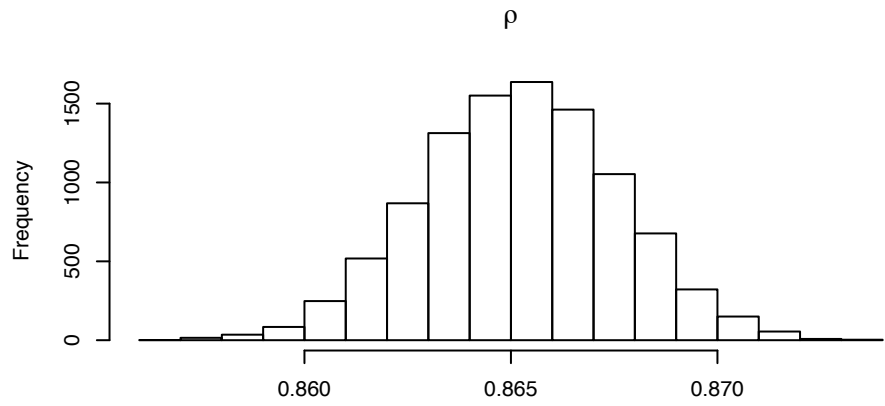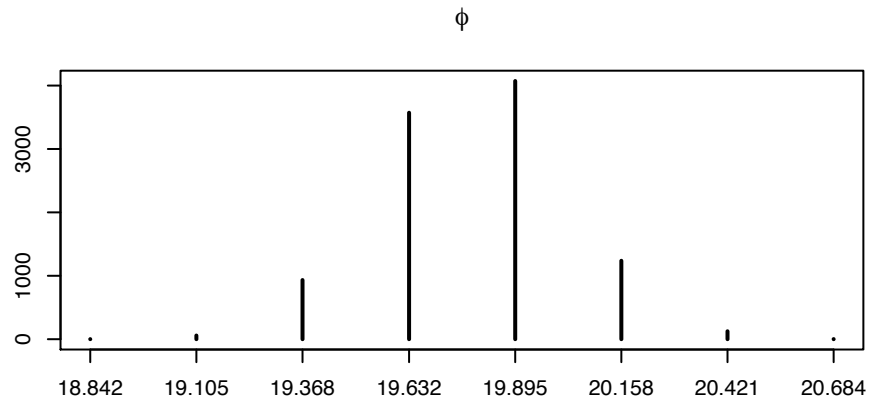

Figure 3: Histograms of the poster samples for  $\sigma^2$ ,  $\rho$  and  $\phi$ . The discrete posterior distribution of  $\phi$  is visualized as a bar plot.
